# Supplementary material for: Termite antimicrobial defense through interaction with symbiotic microorganisms in nest materials
Source: Sci Rep. 2025 Jul 2;15:23391. doi: 10.1038/s41598-025-07667-2 (PMC12222720; doi:10.1038/s41598-025-07667-2)
Supplement: Supplementary file 1 — Supplementary Information 1. [file 41598_2025_7667_MOESM1_ESM.xlsx]

## Sheet: Supplementary_survivaltime
Replication	Colony	Treatment	Time(hour)	Survival
1	KM240	control	180	0
2	KM240	control	180	0
3	KM240	control	180	0
4	KM240	control	180	0
5	KM240	control	180	0
6	KM240	control	180	0
7	KM240	control	180	0
8	KM240	control	180	0
9	KM240	control	180	1
10	KM240	control	180	0
11	KM240	control	180	0
12	KM240	control	180	0
13	KM240	control	180	0
14	KM240	control	180	0
15	KM240	control	180	0
16	KM240	control	180	0
17	KM240	control	180	0
18	KM240	control	180	0
19	KM240	control	180	0
20	KM240	control	180	0
21	KM240	control	180	0
22	KM240	control	180	0
23	KM240	control	180	0
24	KM240	control	180	0
1	KM240	metarhiizum	72	1
2	KM240	metarhiizum	96	1
3	KM240	metarhiizum	60	1
4	KM240	metarhiizum	84	1
5	KM240	metarhiizum	60	1
6	KM240	metarhiizum	108	1
7	KM240	metarhiizum	108	1
8	KM240	metarhiizum	108	1
9	KM240	metarhiizum	108	1
10	KM240	metarhiizum	96	1
11	KM240	metarhiizum	60	1
12	KM240	metarhiizum	72	1
13	KM240	metarhiizum	60	1
14	KM240	metarhiizum	84	1
15	KM240	metarhiizum	96	1
16	KM240	metarhiizum	84	1
17	KM240	metarhiizum	96	1
18	KM240	metarhiizum	96	1
19	KM240	metarhiizum	96	1
20	KM240	metarhiizum	108	1
21	KM240	metarhiizum	60	1
22	KM240	metarhiizum	108	1
23	KM240	metarhiizum	96	1
24	KM240	metarhiizum	96	1
1	KM263	control	180	0
2	KM263	control	180	0
3	KM263	control	180	0
4	KM263	control	180	0
5	KM263	control	180	0
6	KM263	control	180	0
7	KM263	control	180	0
8	KM263	control	180	0
9	KM263	control	180	0
10	KM263	control	180	0
11	KM263	control	180	0
12	KM263	control	180	0
13	KM263	control	180	0
14	KM263	control	180	0
15	KM263	control	180	0
16	KM263	control	180	0
17	KM263	control	180	0
18	KM263	control	180	0
19	KM263	control	180	0
20	KM263	control	180	0
21	KM263	control	180	0
22	KM263	control	180	0
23	KM263	control	180	0
24	KM263	control	180	0
1	KM263	metarhiizum	84	1
2	KM263	metarhiizum	60	1
3	KM263	metarhiizum	120	1
4	KM263	metarhiizum	108	1
5	KM263	metarhiizum	72	1
6	KM263	metarhiizum	72	1
7	KM263	metarhiizum	120	1
8	KM263	metarhiizum	84	1
9	KM263	metarhiizum	84	1
10	KM263	metarhiizum	108	1
11	KM263	metarhiizum	48	1
12	KM263	metarhiizum	108	1
13	KM263	metarhiizum	96	1
14	KM263	metarhiizum	60	1
15	KM263	metarhiizum	120	1
16	KM263	metarhiizum	96	1
17	KM263	metarhiizum	108	1
18	KM263	metarhiizum	60	1
19	KM263	metarhiizum	48	1
20	KM263	metarhiizum	120	1
21	KM263	metarhiizum	96	1
22	KM263	metarhiizum	72	1
23	KM263	metarhiizum	84	1
24	KM263	metarhiizum	48	1
1	KM269	control	180	0
2	KM269	control	180	0
3	KM269	control	180	0
4	KM269	control	180	0
5	KM269	control	180	1
6	KM269	control	180	0
7	KM269	control	180	1
8	KM269	control	180	0
9	KM269	control	180	0
10	KM269	control	180	0
11	KM269	control	180	0
12	KM269	control	180	0
13	KM269	control	180	0
14	KM269	control	180	0
15	KM269	control	180	0
16	KM269	control	180	0
17	KM269	control	180	0
18	KM269	control	180	0
19	KM269	control	180	0
20	KM269	control	180	0
21	KM269	control	180	0
22	KM269	control	180	0
23	KM269	control	180	0
24	KM269	control	180	0
1	KM269	metarhiizum	108	1
2	KM269	metarhiizum	108	1
3	KM269	metarhiizum	96	1
4	KM269	metarhiizum	132	1
5	KM269	metarhiizum	96	1
6	KM269	metarhiizum	72	1
7	KM269	metarhiizum	180	1
8	KM269	metarhiizum	84	1
9	KM269	metarhiizum	72	1
10	KM269	metarhiizum	60	1
11	KM269	metarhiizum	96	1
12	KM269	metarhiizum	108	1
13	KM269	metarhiizum	72	1
14	KM269	metarhiizum	108	1
15	KM269	metarhiizum	108	1
16	KM269	metarhiizum	96	1
17	KM269	metarhiizum	120	1
18	KM269	metarhiizum	84	1
19	KM269	metarhiizum	96	1
20	KM269	metarhiizum	120	1
21	KM269	metarhiizum	108	1
22	KM269	metarhiizum	96	1
23	KM269	metarhiizum	108	1
24	KM269	metarhiizum	96	1
1	C234	control	180	0
2	C234	control	180	0
3	C234	control	180	0
4	C234	control	180	0
5	C234	control	180	0
6	C234	control	180	0
7	C234	control	180	0
8	C234	control	180	0
9	C234	control	180	0
10	C234	control	180	0
11	C234	control	180	0
12	C234	control	180	0
13	C234	control	180	0
14	C234	control	180	0
15	C234	control	180	0
16	C234	control	180	0
17	C234	control	180	0
18	C234	control	180	0
19	C234	control	180	0
20	C234	control	180	0
21	C234	control	180	0
22	C234	control	180	0
23	C234	control	180	0
24	C234	control	180	0
1	C234	metarhiizum	144	1
2	C234	metarhiizum	96	1
3	C234	metarhiizum	180	1
4	C234	metarhiizum	60	1
5	C234	metarhiizum	96	1
6	C234	metarhiizum	84	1
7	C234	metarhiizum	156	1
8	C234	metarhiizum	120	1
9	C234	metarhiizum	108	1
10	C234	metarhiizum	108	1
11	C234	metarhiizum	84	1
12	C234	metarhiizum	84	1
13	C234	metarhiizum	108	1
14	C234	metarhiizum	108	1
15	C234	metarhiizum	84	1
16	C234	metarhiizum	120	1
17	C234	metarhiizum	60	1
18	C234	metarhiizum	84	1
19	C234	metarhiizum	96	1
20	C234	metarhiizum	72	1
21	C234	metarhiizum	84	1
22	C234	metarhiizum	48	1
23	C234	metarhiizum	72	1
24	C234	metarhiizum	72	1

## Sheet: Behavioral_response_corpse
Colony	Replication	Treatment	Postmortem_time(day)	Disposal*	*c: cannibalized, b: buried, i: ignored
KM240	1	control	0	c
KM240	2	control	0	i
KM240	3	control	0	c
KM240	4	control	0	c
KM240	5	control	0	c
KM240	6	control	0	b
KM240	7	control	0	c
KM240	8	control	0	c
KM240	9	control	0	c
KM240	10	control	0	c
KM240	1	pathogen	0	c
KM240	2	pathogen	0	c
KM240	3	pathogen	0	c
KM240	4	pathogen	0	b
KM240	5	pathogen	0	c
KM240	6	pathogen	0	c
KM240	7	pathogen	0	c
KM240	8	pathogen	0	c
KM240	9	pathogen	0	c
KM240	10	pathogen	0	c
C234	1	control	0	c
C234	2	control	0	c
C234	3	control	0	i
C234	4	control	0	b
C234	5	control	0	c
C234	6	control	0	b
C234	7	control	0	i
C234	8	control	0	b
C234	9	control	0	c
C234	10	control	0	c
C234	1	pathogen	0	b
C234	2	pathogen	0	i
C234	3	pathogen	0	i
C234	4	pathogen	0	b
C234	5	pathogen	0	c
C234	6	pathogen	0	b
C234	7	pathogen	0	i
C234	8	pathogen	0	i
C234	9	pathogen	0	c
C234	10	pathogen	0	c
KM240	1	control	24	c
KM240	2	control	24	b
KM240	3	control	24	c
KM240	4	control	24	c
KM240	5	control	24	c
KM240	6	control	24	b
KM240	7	control	24	i
KM240	8	control	24	c
KM240	9	control	24	c
KM240	10	control	24	c
KM240	1	pathogen	24	b
KM240	2	pathogen	24	c
KM240	3	pathogen	24	c
KM240	4	pathogen	24	c
KM240	5	pathogen	24	b
KM240	6	pathogen	24	b
KM240	7	pathogen	24	b
KM240	8	pathogen	24	c
KM240	9	pathogen	24	c
KM240	10	pathogen	24	c
C234	1	control	24	b
C234	2	control	24	c
C234	3	control	24	c
C234	4	control	24	c
C234	5	control	24	c
C234	6	control	24	c
C234	7	control	24	c
C234	8	control	24	c
C234	9	control	24	b
C234	10	control	24	c
C234	1	pathogen	24	b
C234	2	pathogen	24	c
C234	3	pathogen	24	b
C234	4	pathogen	24	b
C234	5	pathogen	24	b
C234	6	pathogen	24	b
C234	7	pathogen	24	b
C234	8	pathogen	24	b
C234	9	pathogen	24	b
C234	10	pathogen	24	b
KM240	1	control	48	c
KM240	2	control	48	c
KM240	3	control	48	c
KM240	4	control	48	c
KM240	5	control	48	c
KM240	6	control	48	c
KM240	7	control	48	c
KM240	8	control	48	c
KM240	9	control	48	c
KM240	10	control	48	c
KM240	1	pathogen	48	c
KM240	2	pathogen	48	c
KM240	3	pathogen	48	b
KM240	4	pathogen	48	b
KM240	5	pathogen	48	b
KM240	6	pathogen	48	b
KM240	7	pathogen	48	b
KM240	8	pathogen	48	b
KM240	9	pathogen	48	b
KM240	10	pathogen	48	c
C234	1	control	48	c
C234	2	control	48	b
C234	3	control	48	b
C234	4	control	48	c
C234	5	control	48	c
C234	6	control	48	c
C234	7	control	48	c
C234	8	control	48	c
C234	9	control	48	c
C234	10	control	48	c
C234	1	pathogen	48	b
C234	2	pathogen	48	b
C234	3	pathogen	48	b
C234	4	pathogen	48	b
C234	5	pathogen	48	b
C234	6	pathogen	48	b
C234	7	pathogen	48	b
C234	8	pathogen	48	b
C234	9	pathogen	48	b
C234	10	pathogen	48	b

## Sheet: Comparison_mycelia
Colony	Replication	Treatment	Day	Mycelia_Area(cm2)
KM107	1	Raw	1	0.247
KM107	2	Raw	1	0.201
KM107	3	Raw	1	0.183
KM107	4	Raw	1	0.416
KM107	5	Raw	1	0.269
KM107	1	Raw	3	0.266
KM107	2	Raw	3	0.321
KM107	3	Raw	3	0.173
KM107	4	Raw	3	0.491
KM107	5	Raw	3	0.322
KM107	1	Raw	5	0.24
KM107	2	Raw	5	0.323
KM107	3	Raw	5	0.444
KM107	4	Raw	5	0.446
KM107	5	Raw	5	0.394
KM107	1	Dry	1	0.127
KM107	2	Dry	1	0.186
KM107	3	Dry	1	0.134
KM107	4	Dry	1	0.242
KM107	5	Dry	1	0.275
KM107	1	Dry	3	0.24
KM107	2	Dry	3	0.323
KM107	3	Dry	3	0.444
KM107	4	Dry	3	0.446
KM107	5	Dry	3	0.394
KM107	1	Dry	5	0.458
KM107	2	Dry	5	1.418
KM107	3	Dry	5	0.487
KM107	4	Dry	5	0.551
KM107	5	Dry	5	0.567
KM107	1	Autoclave	1	0.243
KM107	2	Autoclave	1	0.662
KM107	3	Autoclave	1	0.4
KM107	4	Autoclave	1	0.254
KM107	5	Autoclave	1	0.324
KM107	1	Autoclave	3	2.825
KM107	2	Autoclave	3	4.029
KM107	3	Autoclave	3	6.554
KM107	4	Autoclave	3	2.829
KM107	5	Autoclave	3	2.763
KM107	1	Autoclave	5	4.154
KM107	2	Autoclave	5	4.13
KM107	3	Autoclave	5	4.837
KM107	4	Autoclave	5	3.426
KM107	5	Autoclave	5	4.457

## Sheet: Antagonistic_bacteria
Species	Replication	Treatment	Bacteria_length(mm)
B.subtilis	1	control	51.87
B.subtilis	2	control	54.25
B.subtilis	3	control	52.4
B.subtilis	4	control	52.05
B.subtilis	5	control	54.96
B.thuringiensis	1	control	48.67
B.thuringiensis	2	control	55.62
B.thuringiensis	3	control	52.28
B.thuringiensis	4	control	53.58
B.thuringiensis	5	control	51.9
M.luteus	1	control	52.88
M.luteus	2	control	48.99
M.luteus	3	control	51.51
M.luteus	4	control	51.28
M.luteus	5	control	48.55
P.aeruginosa	1	control	50.33
P.aeruginosa	2	control	50.09
P.aeruginosa	3	control	52.93
P.aeruginosa	4	control	53.39
P.aeruginosa	5	control	49.5
S.marcescens	1	control	50.34
S.marcescens	2	control	49.76
S.marcescens	3	control	51.21
S.marcescens	4	control	53.01
S.marcescens	5	control	52.28
B.subtilis	1	streptomyces	26.61
B.subtilis	2	streptomyces	26.4
B.subtilis	3	streptomyces	27.2
B.subtilis	4	streptomyces	23.67
B.subtilis	5	streptomyces	17.72
M.luteus	1	streptomyces	33.76
M.luteus	2	streptomyces	12.31
M.luteus	3	streptomyces	17.56
M.luteus	4	streptomyces	13.78
M.luteus	5	streptomyces	15.6
S.marcescens	1	streptomyces	47.55
S.marcescens	2	streptomyces	50.76
S.marcescens	3	streptomyces	50.75
S.marcescens	4	streptomyces	48.4
S.marcescens	5	streptomyces	51.28
P.aeruginosa	1	streptomyces	52.66
P.aeruginosa	2	streptomyces	54.85
P.aeruginosa	3	streptomyces	53.8
P.aeruginosa	4	streptomyces	51.2
P.aeruginosa	5	streptomyces	53.16
B.thuringiensis	1	streptomyces	32.55
B.thuringiensis	2	streptomyces	34.65
B.thuringiensis	3	streptomyces	32.81
B.thuringiensis	4	streptomyces	32.52
B.thuringiensis	5	streptomyces	33

## Sheet: Antagonistic_fungi
Species	Replication	Treatment	Day	Fungi_area(cm2)
Beauveria_bassiana	1	streptomyces	3	0.324
Beauveria_bassiana	2	streptomyces	3	0.475
Beauveria_bassiana	3	streptomyces	3	0.468
Beauveria_bassiana	4	streptomyces	3	0.403
Beauveria_bassiana	5	streptomyces	3	0.239
Beauveria_bassiana	1	control	3	0.511
Beauveria_bassiana	2	control	3	0.602
Beauveria_bassiana	3	control	3	0.473
Beauveria_bassiana	4	control	3	0.435
Beauveria_bassiana	5	control	3	0.578
Beauveria_bassiana	1	streptomyces	6	0.887
Beauveria_bassiana	2	streptomyces	6	0.629
Beauveria_bassiana	3	streptomyces	6	1.441
Beauveria_bassiana	4	streptomyces	6	0.867
Beauveria_bassiana	5	streptomyces	6	1.083
Beauveria_bassiana	1	control	6	2.103
Beauveria_bassiana	2	control	6	1.887
Beauveria_bassiana	3	control	6	1.531
Beauveria_bassiana	4	control	6	1.419
Beauveria_bassiana	5	control	6	1.283
Beauveria_bassiana	1	streptomyces	9	3.362
Beauveria_bassiana	2	streptomyces	9	1.979
Beauveria_bassiana	3	streptomyces	9	2.553
Beauveria_bassiana	4	streptomyces	9	3.206
Beauveria_bassiana	5	streptomyces	9	1.295
Beauveria_bassiana	1	control	9	7.957
Beauveria_bassiana	2	control	9	8.291
Beauveria_bassiana	3	control	9	9.661
Beauveria_bassiana	4	control	9	7.279
Beauveria_bassiana	5	control	9	26.87
Beauveria_bassiana	1	control	12	13.57
Beauveria_bassiana	2	control	12	10.04
Beauveria_bassiana	3	control	12	15.052
Beauveria_bassiana	4	control	12	11.228
Beauveria_bassiana	5	control	12	31.369
Beauveria_bassiana	1	streptomyces	12	3.889
Beauveria_bassiana	2	streptomyces	12	2.001
Beauveria_bassiana	3	streptomyces	12	1.698
Beauveria_bassiana	4	streptomyces	12	2.056
Beauveria_bassiana	5	streptomyces	12	5.048
Metarhizium_anisopliae	1	control	3	0.871
Metarhizium_anisopliae	2	control	3	1.025
Metarhizium_anisopliae	3	control	3	1.155
Metarhizium_anisopliae	4	control	3	0.753
Metarhizium_anisopliae	5	control	3	0.472
Metarhizium_anisopliae	1	streptomyces	3	0.452
Metarhizium_anisopliae	2	streptomyces	3	0.432
Metarhizium_anisopliae	3	streptomyces	3	0.513
Metarhizium_anisopliae	4	streptomyces	3	0.512
Metarhizium_anisopliae	5	streptomyces	3	0.342
Metarhizium_anisopliae	1	streptomyces	6	0.842
Metarhizium_anisopliae	2	streptomyces	6	1.064
Metarhizium_anisopliae	3	streptomyces	6	0.924
Metarhizium_anisopliae	4	streptomyces	6	1.328
Metarhizium_anisopliae	5	streptomyces	6	1.194
Metarhizium_anisopliae	1	control	6	2.045
Metarhizium_anisopliae	2	control	6	2.415
Metarhizium_anisopliae	3	control	6	3.836
Metarhizium_anisopliae	4	control	6	1.739
Metarhizium_anisopliae	5	control	6	1.069
Metarhizium_anisopliae	1	control	9	12.177
Metarhizium_anisopliae	2	control	9	9.653
Metarhizium_anisopliae	3	control	9	12.828
Metarhizium_anisopliae	4	control	9	6.313
Metarhizium_anisopliae	5	control	9	17.214
Metarhizium_anisopliae	1	streptomyces	9	13.047
Metarhizium_anisopliae	2	streptomyces	9	1.752
Metarhizium_anisopliae	3	streptomyces	9	2.225
Metarhizium_anisopliae	4	streptomyces	9	2.218
Metarhizium_anisopliae	5	streptomyces	9	4.233
Metarhizium_anisopliae	1	control	12	12.67
Metarhizium_anisopliae	2	control	12	15.45
Metarhizium_anisopliae	3	control	12	14.194
Metarhizium_anisopliae	4	control	12	36.961
Metarhizium_anisopliae	5	control	12	22.407
Metarhizium_anisopliae	1	streptomyces	12	4.943
Metarhizium_anisopliae	2	streptomyces	12	5.398
Metarhizium_anisopliae	3	streptomyces	12	3.447
Metarhizium_anisopliae	4	streptomyces	12	3.033
Metarhizium_anisopliae	5	streptomyces	12	1.668

## Sheet: Survivaltime_streptomyces
Colony	Replication	Day	Treatment	Survival
A040	1	20	control	0
A040	2	20	control	0
A040	3	20	control	0
A040	4	20	control	0
A040	5	20	control	0
A040	6	20	control	0
A040	7	20	control	0
A040	8	20	control	0
A040	9	20	control	0
A040	10	20	control	0
A040	11	20	control	0
A040	12	20	control	0
A040	13	20	control	0
A040	14	20	control	0
A040	15	20	control	0
A040	16	20	control	0
A040	17	20	control	0
A040	18	20	control	0
A040	19	20	control	0
A040	20	20	control	0
A040	21	20	control	0
A040	22	20	control	0
A040	23	20	control	0
A040	24	20	control	0
A040	1	20	metarhizium	0
A040	2	20	metarhizium	0
A040	3	14	metarhizium	1
A040	4	20	metarhizium	0
A040	5	18	metarhizium	1
A040	6	20	metarhizium	0
A040	7	20	metarhizium	1
A040	8	20	metarhizium	0
A040	9	20	metarhizium	0
A040	10	20	metarhizium	0
A040	11	20	metarhizium	0
A040	12	20	metarhizium	0
A040	13	16	metarhizium	1
A040	14	20	metarhizium	0
A040	15	20	metarhizium	0
A040	16	20	metarhizium	0
A040	17	20	metarhizium	0
A040	18	20	metarhizium	0
A040	19	12	metarhizium	1
A040	20	20	metarhizium	0
A040	21	14	metarhizium	1
A040	22	20	metarhizium	0
A040	23	12	metarhizium	1
A040	24	20	metarhizium	0
A040	1	20	streptomyces	0
A040	2	20	streptomyces	0
A040	3	20	streptomyces	0
A040	4	20	streptomyces	0
A040	5	20	streptomyces	0
A040	6	20	streptomyces	0
A040	7	20	streptomyces	0
A040	8	20	streptomyces	0
A040	9	20	streptomyces	0
A040	10	20	streptomyces	0
A040	11	20	streptomyces	0
A040	12	20	streptomyces	0
A040	13	20	streptomyces	0
A040	14	20	streptomyces	0
A040	15	20	streptomyces	0
A040	16	20	streptomyces	0
A040	17	20	streptomyces	0
A040	18	20	streptomyces	0
A040	19	20	streptomyces	0
A040	20	20	streptomyces	0
A040	21	20	streptomyces	0
A040	22	20	streptomyces	0
A040	23	20	streptomyces	0
A040	24	20	streptomyces	0
A040	1	12	streptomyces_metarhizium	1
A040	2	20	streptomyces_metarhizium	0
A040	3	20	streptomyces_metarhizium	1
A040	4	20	streptomyces_metarhizium	0
A040	5	20	streptomyces_metarhizium	0
A040	6	14	streptomyces_metarhizium	1
A040	7	20	streptomyces_metarhizium	1
A040	8	14	streptomyces_metarhizium	1
A040	9	18	streptomyces_metarhizium	1
A040	10	20	streptomyces_metarhizium	0
A040	11	20	streptomyces_metarhizium	0
A040	12	20	streptomyces_metarhizium	0
A040	13	20	streptomyces_metarhizium	0
A040	14	20	streptomyces_metarhizium	1
A040	15	20	streptomyces_metarhizium	0
A040	16	18	streptomyces_metarhizium	1
A040	17	20	streptomyces_metarhizium	0
A040	18	20	streptomyces_metarhizium	0
A040	19	20	streptomyces_metarhizium	0
A040	20	20	streptomyces_metarhizium	0
A040	21	20	streptomyces_metarhizium	1
A040	22	20	streptomyces_metarhizium	0
A040	23	18	streptomyces_metarhizium	1
A040	23	20	streptomyces_metarhizium	0
A040	24	20	streptomyces_metarhizium	0
C234	1	20	control	0
C234	2	20	control	0
C234	3	20	control	0
C234	4	20	control	0
C234	5	20	control	0
C234	6	20	control	0
C234	7	20	control	0
C234	8	20	control	0
C234	9	20	control	0
C234	10	20	control	0
C234	11	20	control	0
C234	12	20	control	0
C234	13	20	control	0
C234	14	20	control	0
C234	15	20	control	0
C234	16	20	control	0
C234	17	20	control	0
C234	18	20	control	0
C234	19	20	control	0
C234	20	20	control	0
C234	21	20	control	0
C234	22	20	control	0
C234	23	20	control	0
C234	24	20	control	0
C234	1	20	metarhizium	0
C234	2	20	metarhizium	0
C234	3	20	metarhizium	0
C234	4	20	metarhizium	0
C234	5	20	metarhizium	0
C234	6	20	metarhizium	0
C234	7	18	metarhizium	1
C234	8	20	metarhizium	0
C234	9	20	metarhizium	0
C234	10	20	metarhizium	0
C234	11	20	metarhizium	0
C234	12	20	metarhizium	0
C234	13	20	metarhizium	0
C234	14	20	metarhizium	0
C234	15	20	metarhizium	0
C234	16	8	metarhizium	1
C234	17	8	metarhizium	1
C234	18	8	metarhizium	1
C234	19	14	metarhizium	1
C234	20	16	metarhizium	1
C234	21	20	metarhizium	0
C234	22	20	metarhizium	0
C234	23	14	metarhizium	1
C234	24	8	metarhizium	1
C234	1	20	streptomyces	0
C234	2	20	streptomyces	0
C234	3	20	streptomyces	0
C234	4	20	streptomyces	0
C234	5	20	streptomyces	0
C234	6	20	streptomyces	0
C234	7	20	streptomyces	0
C234	8	20	streptomyces	0
C234	9	20	streptomyces	0
C234	10	20	streptomyces	0
C234	11	20	streptomyces	0
C234	12	20	streptomyces	0
C234	13	20	streptomyces	0
C234	14	8	streptomyces	1
C234	15	20	streptomyces	0
C234	16	20	streptomyces	0
C234	17	20	streptomyces	0
C234	18	20	streptomyces	0
C234	19	20	streptomyces	0
C234	20	20	streptomyces	0
C234	21	20	streptomyces	0
C234	22	20	streptomyces	0
C234	23	20	streptomyces	0
C234	24	20	streptomyces	0
C234	1	16	streptomyces_metarhizium	1
C234	2	20	streptomyces_metarhizium	1
C234	3	20	streptomyces_metarhizium	0
C234	4	20	streptomyces_metarhizium	0
C234	5	12	streptomyces_metarhizium	1
C234	6	20	streptomyces_metarhizium	1
C234	7	20	streptomyces_metarhizium	0
C234	8	20	streptomyces_metarhizium	0
C234	9	20	streptomyces_metarhizium	0
C234	10	20	streptomyces_metarhizium	0
C234	11	20	streptomyces_metarhizium	0
C234	12	20	streptomyces_metarhizium	0
C234	13	20	streptomyces_metarhizium	0
C234	14	20	streptomyces_metarhizium	0
C234	15	20	streptomyces_metarhizium	0
C234	16	20	streptomyces_metarhizium	0
C234	17	20	streptomyces_metarhizium	1
C234	18	20	streptomyces_metarhizium	0
C234	19	20	streptomyces_metarhizium	0
C234	20	20	streptomyces_metarhizium	0
C234	21	18	streptomyces_metarhizium	1
C234	22	20	streptomyces_metarhizium	0
C234	23	20	streptomyces_metarhizium	0
C234	24	20	streptomyces_metarhizium	0
KM247	1	20	control	0
KM247	2	20	control	0
KM247	3	20	control	0
KM247	4	20	control	0
KM247	5	20	control	0
KM247	6	20	control	0
KM247	7	20	control	0
KM247	8	20	control	0
KM247	9	20	control	0
KM247	10	20	control	0
KM247	11	20	control	0
KM247	12	20	control	0
KM247	13	20	control	0
KM247	14	20	control	0
KM247	15	20	control	0
KM247	16	20	control	0
KM247	17	20	control	0
KM247	18	20	control	0
KM247	19	20	control	0
KM247	20	20	control	0
KM247	21	20	control	0
KM247	22	20	control	0
KM247	23	20	control	0
KM247	24	20	control	0
KM247	1	18	metarhizium	1
KM247	2	16	metarhizium	1
KM247	3	20	metarhizium	0
KM247	4	20	metarhizium	0
KM247	5	20	metarhizium	1
KM247	6	14	metarhizium	1
KM247	7	20	metarhizium	1
KM247	8	12	metarhizium	1
KM247	9	20	metarhizium	0
KM247	10	12	metarhizium	1
KM247	11	20	metarhizium	0
KM247	12	20	metarhizium	1
KM247	13	20	metarhizium	0
KM247	14	20	metarhizium	1
KM247	15	16	metarhizium	1
KM247	16	20	metarhizium	0
KM247	17	20	metarhizium	0
KM247	18	14	metarhizium	1
KM247	19	10	metarhizium	1
KM247	20	20	metarhizium	0
KM247	21	10	metarhizium	1
KM247	22	16	metarhizium	1
KM247	23	8	metarhizium	1
KM247	24	10	metarhizium	1
KM247	1	20	streptomyces	0
KM247	2	20	streptomyces	0
KM247	3	20	streptomyces	0
KM247	4	20	streptomyces	0
KM247	5	20	streptomyces	0
KM247	6	20	streptomyces	0
KM247	7	20	streptomyces	0
KM247	8	20	streptomyces	0
KM247	9	20	streptomyces	0
KM247	10	20	streptomyces	0
KM247	11	20	streptomyces	0
KM247	12	20	streptomyces	0
KM247	13	20	streptomyces	0
KM247	14	20	streptomyces	0
KM247	15	20	streptomyces	0
KM247	16	20	streptomyces	0
KM247	17	20	streptomyces	0
KM247	18	20	streptomyces	0
KM247	19	20	streptomyces	0
KM247	20	20	streptomyces	0
KM247	21	20	streptomyces	0
KM247	22	20	streptomyces	0
KM247	23	20	streptomyces	0
KM247	24	20	streptomyces	0
KM247	1	20	streptomyces_metarhizium	1
KM247	2	20	streptomyces_metarhizium	0
KM247	3	20	streptomyces_metarhizium	0
KM247	4	20	streptomyces_metarhizium	0
KM247	5	20	streptomyces_metarhizium	0
KM247	6	20	streptomyces_metarhizium	0
KM247	7	12	streptomyces_metarhizium	1
KM247	8	20	streptomyces_metarhizium	0
KM247	9	20	streptomyces_metarhizium	0
KM247	10	20	streptomyces_metarhizium	0
KM247	11	20	streptomyces_metarhizium	0
KM247	12	12	streptomyces_metarhizium	1
KM247	13	20	streptomyces_metarhizium	0
KM247	14	20	streptomyces_metarhizium	0
KM247	15	20	streptomyces_metarhizium	0
KM247	16	20	streptomyces_metarhizium	0
KM247	17	20	streptomyces_metarhizium	0
KM247	18	20	streptomyces_metarhizium	0
KM247	19	20	streptomyces_metarhizium	0
KM247	20	14	streptomyces_metarhizium	1
KM247	21	20	streptomyces_metarhizium	0
KM247	22	20	streptomyces_metarhizium	0
KM247	23	18	streptomyces_metarhizium	1
KM247	24	20	streptomyces_metarhizium	1
KM269	1	20	control	0
KM269	2	20	control	0
KM269	3	20	control	0
KM269	4	20	control	0
KM269	5	20	control	0
KM269	6	20	control	0
KM269	7	20	control	0
KM269	8	20	control	0
KM269	9	20	control	0
KM269	10	20	control	0
KM269	11	20	control	0
KM269	12	20	control	0
KM269	13	20	control	0
KM269	14	20	control	0
KM269	15	20	control	0
KM269	16	20	control	0
KM269	17	20	control	0
KM269	18	20	control	0
KM269	19	20	control	0
KM269	20	20	control	0
KM269	21	20	control	0
KM269	22	20	control	0
KM269	23	20	control	0
KM269	24	20	control	0
KM269	1	20	metarhizium	0
KM269	2	6	metarhizium	1
KM269	3	20	metarhizium	0
KM269	4	20	metarhizium	0
KM269	5	10	metarhizium	1
KM269	6	20	metarhizium	0
KM269	7	16	metarhizium	1
KM269	8	16	metarhizium	1
KM269	9	18	metarhizium	1
KM269	10	10	metarhizium	1
KM269	11	18	metarhizium	1
KM269	12	20	metarhizium	0
KM269	13	20	metarhizium	0
KM269	14	8	metarhizium	1
KM269	15	20	metarhizium	0
KM269	16	20	metarhizium	0
KM269	17	20	metarhizium	0
KM269	18	20	metarhizium	0
KM269	19	18	metarhizium	1
KM269	20	20	metarhizium	0
KM269	21	18	metarhizium	1
KM269	22	20	metarhizium	0
KM269	23	20	metarhizium	0
KM269	24	20	metarhizium	0
KM269	1	20	streptomyces	0
KM269	2	20	streptomyces	0
KM269	3	20	streptomyces	0
KM269	4	20	streptomyces	0
KM269	5	20	streptomyces	0
KM269	6	20	streptomyces	0
KM269	7	20	streptomyces	0
KM269	8	20	streptomyces	0
KM269	9	20	streptomyces	0
KM269	10	20	streptomyces	0
KM269	11	20	streptomyces	0
KM269	12	20	streptomyces	0
KM269	13	20	streptomyces	0
KM269	14	20	streptomyces	0
KM269	15	20	streptomyces	0
KM269	16	20	streptomyces	0
KM269	17	20	streptomyces	0
KM269	18	20	streptomyces	0
KM269	19	20	streptomyces	0
KM269	20	20	streptomyces	0
KM269	21	20	streptomyces	0
KM269	22	20	streptomyces	0
KM269	23	20	streptomyces	0
KM269	24	20	streptomyces	0
KM269	1	20	streptomyces_metarhizium	0
KM269	2	20	streptomyces_metarhizium	0
KM269	3	20	streptomyces_metarhizium	0
KM269	4	20	streptomyces_metarhizium	0
KM269	5	20	streptomyces_metarhizium	0
KM269	6	20	streptomyces_metarhizium	0
KM269	7	20	streptomyces_metarhizium	0
KM269	8	20	streptomyces_metarhizium	0
KM269	9	20	streptomyces_metarhizium	0
KM269	10	8	streptomyces_metarhizium	1
KM269	11	20	streptomyces_metarhizium	0
KM269	12	20	streptomyces_metarhizium	0
KM269	13	20	streptomyces_metarhizium	0
KM269	14	20	streptomyces_metarhizium	0
KM269	15	20	streptomyces_metarhizium	0
KM269	16	20	streptomyces_metarhizium	0
KM269	17	18	streptomyces_metarhizium	1
KM269	18	20	streptomyces_metarhizium	0
KM269	19	20	streptomyces_metarhizium	1
KM269	20	20	streptomyces_metarhizium	0
KM269	21	20	streptomyces_metarhizium	0
KM269	22	20	streptomyces_metarhizium	0
KM269	23	20	streptomyces_metarhizium	0
KM269	24	14	streptomyces_metarhizium	1

## Sheet: Quantification_Streptomyces_qPC
Colony	Relplicate	Duplicate	Treatment	Day	Weight(mg)	Quantity(copies)	Copies(copies/mg)
KM112	A	1	none	1	439	2.95234e+07	67251.5
KM112	A	2	none	1	439	2.86725e+07	65313.1
KM112	B	1	none	1	451	1.866e+07	41374.7
KM112	B	2	none	1	451	1.88424e+07	41779.1
KM112	C	1	none	1	449	21342305	47533
KM112	C	2	none	1	449	2.14746e+07	47827.6
KM240	A	1	none	1	414	6.89104e+06	16645
KM240	A	2	none	1	414	6.98106e+06	16862.5
KM240	B	1	none	1	434	4.46619e+06	10290.8
KM240	B	2	none	1	434	4.28873e+06	9881.86
KM240	C	1	none	1	443	4037470	9113.93
KM240	C	2	none	1	443	4.11648e+06	9292.29
KM269	A	1	none	1	473	1.56202e+06	3302.37
KM269	A	2	none	1	473	1.56179e+06	3301.89
KM269	B	1	none	1	446	1.39997e+06	3138.95
KM269	B	2	none	1	446	1.3731e+06	3078.71
KM269	C	1	none	1	489	1.46389e+06	2993.64
KM269	C	2	none	1	489	1.50931e+06	3086.53
KM112	A	1	infect	1	426	3.5279e+07	82814.5
KM112	A	2	infect	1	426	3.32894e+07	78144.1
KM112	B	1	infect	1	439	1.86536e+07	42491.2
KM112	B	2	infect	1	439	1.87767e+07	42771.5
KM112	C	1	infect	1	432	24165315	55938.2
KM112	C	2	infect	1	432	2.44434e+07	56582
KM240	A	1	infect	1	440	4.91055e+06	11160.3
KM240	A	2	infect	1	440	5.06474e+06	11510.8
KM240	B	1	infect	1	455	4.20105e+06	9233.07
KM240	B	2	infect	1	455	4.08306e+06	8973.75
KM240	C	1	infect	1	457	4.98737e+06	10913.3
KM240	C	2	infect	1	457	4.79081e+06	10483.2
KM269	A	1	infect	1	459	882698	1923.09
KM269	A	2	infect	1	459	968176	2109.32
KM269	B	1	infect	1	471	1.09691e+06	2328.9
KM269	B	2	infect	1	471	1.08026e+06	2293.55
KM269	C	1	infect	1	442	779792	1764.23
KM269	C	2	infect	1	442	778806	1762
KM112	A	1	none	5	445	2.60221e+07	58476.6
KM112	A	2	none	5	445	2.57452e+07	57854.4
KM112	B	1	none	5	479	2.88034e+07	60132.3
KM112	B	2	none	5	479	2.91161e+07	60785.2
KM112	C	1	none	5	454	56594190	124657
KM112	C	2	none	5	454	54619170	120307
KM240	A	1	none	5	439	2.37655e+06	5413.55
KM240	A	2	none	5	439	2.17883e+06	4963.16
KM240	B	1	none	5	486	1.24237e+06	2556.31
KM240	B	2	none	5	486	1.17624e+06	2420.25
KM240	C	1	none	5	429	19241415	44851.8
KM240	C	2	none	5	429	19106055	44536.3
KM269	A	1	none	5	474	6.76821e+06	14278.9
KM269	A	2	none	5	474	6.53231e+06	13781.2
KM269	B	1	none	5	453	8.46265e+06	18681.3
KM269	B	2	none	5	453	8.3635e+06	18462.5
KM269	C	1	none	5	438	3.0782e+06	7027.85
KM269	C	2	none	5	438	3.02953e+06	6916.74
KM112	A	1	infect	5	481	43826860	91116.1
KM112	A	2	infect	5	481	4.06342e+07	84478.5
KM112	B	1	infect	5	427	71267535	166903
KM112	B	2	infect	5	427	69931435	163774
KM112	C	1	infect	5	434	35158635	81010.7
KM112	C	2	infect	5	434	33243015	76596.8
KM240	A	1	infect	5	456	1.4665e+06	3216
KM240	A	2	infect	5	456	1.46188e+06	3205.89
KM240	B	1	infect	5	486	797408	1640.76
KM240	B	2	infect	5	486	768660	1581.6
KM240	C	1	infect	5	476	3.35776e+07	70541.2
KM240	C	2	infect	5	476	37929530	79683.9
KM269	A	1	infect	5	469	5.2635e+06	11222.8
KM269	A	2	infect	5	469	5.47605e+06	11676
KM269	B	1	infect	5	467	1.64128e+06	3514.52
KM269	B	2	infect	5	467	1.76461e+06	3778.6
KM112	A	1	none	10	437.2	2.92033e+07	66796.1
KM112	A	2	none	10	437.2	3.02436e+07	69175.7
KM112	B	1	none	10	432.9	28470630	65767.2
KM112	B	2	none	10	432.9	29180575	67407.2
KM112	C	1	none	10	464.5	25713105	55356.5
KM112	C	2	none	10	464.5	24485870	52714.5
KM240	A	1	none	10	443.4	7.07599e+06	15958.5
KM240	A	2	none	10	443.4	7015360	15821.7
KM240	B	1	none	10	426.1	6.86436e+06	16109.7
KM240	B	2	none	10	426.1	6.5157e+06	15291.5
KM240	C	1	none	10	449.2	7.75625e+06	17266.8
KM240	C	2	none	10	449.2	7.3994e+06	16472.4
KM269	A	1	none	10	463	742642	1603.98
KM269	A	2	none	10	463	788647	1703.34
KM269	B	1	none	10	448.4	966023	2154.38
KM269	B	2	none	10	448.4	908294	2025.63
KM269	C	1	none	10	470	759109	1615.12
KM269	C	2	none	10	470	743752	1582.45
KM112	A	1	infect	10	447.1	45511840	101793
KM112	A	2	infect	10	447.1	43581045	97474.9
KM112	B	1	infect	10	473.8	28480795	60111.4
KM112	B	2	infect	10	473.8	2.90003e+07	61207.8
KM112	C	1	infect	10	431.1	51344555	119101
KM112	C	2	infect	10	431.1	51153505	118658
KM240	A	1	infect	10	457.4	629154	1375.5
KM240	A	2	infect	10	457.4	671981	1469.13
KM240	B	1	infect	10	441	8.319e+06	18863.9
KM240	B	2	infect	10	441	11736015	26612.3
KM240	C	1	infect	10	471	1.66076e+07	35260.3
KM240	C	2	infect	10	471	16196510	34387.5
KM269	A	1	infect	10	443	7.17071e+06	16186.7
KM269	A	2	infect	10	443	7.07303e+06	15966.2
KM269	B	1	infect	10	460.3	2.11758e+06	4600.43
KM269	B	2	infect	10	460.3	2.20224e+06	4784.36
KM269	C	1	infect	10	471.1	614131	1303.61
KM269	C	2	infect	10	471.1	499991	1061.33

## Sheet: Quantification_antifungal_absor
Pathogen	Day	Colony	Treatment	Plate	Replication	Recorded_absorb	Relative	Antifungal
M.anisopliae	1	KM112	not_buried	1	1	0.172	0.98693	0.0130698
M.anisopliae	1	KM112	not_buried	1	2	0.091	0.522155	0.477845
M.anisopliae	1	KM112	not_buried	1	3	0.152	0.872171	0.127829
M.anisopliae	1	KM112	not_buried	1	4	0.097	0.556583	0.443417
M.anisopliae	1	KM112	not_buried	1	5	0.164	0.941026	0.0589735
M.anisopliae	1	KM112	not_buried	1	6	0.064	0.36723	0.63277
M.anisopliae	1	KM112	not_buried	1	7	0.119	0.682818	0.317182
M.anisopliae	1	KM112	not_buried	1	8	0.236	1.35416	-0.35416
M.anisopliae	1	KM112	not_buried	1	9	0.173	0.992668	0.00733185
M.anisopliae	1	KM240	not_buried	1	1	0.045	0.258208	0.741792
M.anisopliae	1	KM240	not_buried	1	2	0.089	0.510679	0.489321
M.anisopliae	1	KM240	not_buried	1	3	0.055	0.315588	0.684412
M.anisopliae	1	KM240	not_buried	1	4	0.163	0.935288	0.0647115
M.anisopliae	1	KM240	not_buried	1	5	0.318	1.82467	-0.824673
M.anisopliae	1	KM240	not_buried	1	6	0.155	0.889385	0.110615
M.anisopliae	1	KM240	not_buried	1	7	0.106	0.608224	0.391776
M.anisopliae	1	KM240	not_buried	1	8	0.127	0.728722	0.271278
M.anisopliae	1	KM240	not_buried	1	9	0.173	0.992668	0.00733185
M.anisopliae	1	KM269	not_buried	1	1	0.108	0.6197	0.3803
M.anisopliae	1	KM269	not_buried	1	2	0.11	0.631176	0.368824
M.anisopliae	1	KM269	not_buried	1	3	0.092	0.527893	0.472107
M.anisopliae	1	KM269	not_buried	1	4	0.123	0.70577	0.29423
M.anisopliae	1	KM269	not_buried	1	5	0.137	0.786101	0.213899
M.anisopliae	1	KM269	not_buried	1	6	0.114	0.654128	0.345872
M.anisopliae	1	KM269	not_buried	1	7	0.215	1.23366	-0.233663
M.anisopliae	1	KM269	not_buried	1	8	0.099	0.568059	0.431941
M.anisopliae	1	KM269	not_buried	1	9	0.077	0.441823	0.558177
M.anisopliae	1	KM112	buried	1	1	0.141	0.809053	0.190947
M.anisopliae	1	KM112	buried	1	2	0.079	0.453299	0.546701
M.anisopliae	1	KM112	buried	1	3	0.135	0.774625	0.225375
M.anisopliae	1	KM112	buried	1	4	0.105	0.602486	0.397514
M.anisopliae	1	KM112	buried	1	5	0.117	0.671342	0.328658
M.anisopliae	1	KM112	buried	1	6	0.158	0.906599	0.0934013
M.anisopliae	1	KM112	buried	1	7	0.101	0.579535	0.420465
M.anisopliae	1	KM112	buried	1	8	0.048	0.275422	0.724578
M.anisopliae	1	KM112	buried	1	9	0.078	0.447561	0.552439
M.anisopliae	1	KM240	buried	1	1	0.099	0.568059	0.431941
M.anisopliae	1	KM240	buried	1	2	0.155	0.889385	0.110615
M.anisopliae	1	KM240	buried	1	3	0.292	1.67549	-0.675486
M.anisopliae	1	KM240	buried	1	4	0.169	0.969716	0.0302837
M.anisopliae	1	KM240	buried	1	5	0.17	0.975454	0.0245457
M.anisopliae	1	KM240	buried	1	6	0.267	1.53204	-0.532037
M.anisopliae	1	KM240	buried	1	7	0.078	0.447561	0.552439
M.anisopliae	1	KM240	buried	1	8	0.048	0.275422	0.724578
M.anisopliae	1	KM240	buried	1	9	0.254	1.45744	-0.457443
M.anisopliae	1	KM269	buried	1	1	0.301	1.72713	-0.727128
M.anisopliae	1	KM269	buried	1	2	0.229	1.31399	-0.313994
M.anisopliae	1	KM269	buried	1	3	0.146	0.837743	0.162257
M.anisopliae	1	KM269	buried	1	4	0.169	0.969716	0.0302837
M.anisopliae	1	KM269	buried	1	5	0.172	0.98693	0.0130698
M.anisopliae	1	KM269	buried	1	6	0.056	0.321326	0.678674
M.anisopliae	1	KM269	buried	1	7	0.153	0.877909	0.122091
M.anisopliae	1	KM269	buried	1	8	0.166	0.952502	0.0474976
M.anisopliae	1	KM269	buried	1	9	0.149	0.854957	0.145043
M.anisopliae	1	KM112	not_buried	2	1	0.174	0.998406	0.00159388
M.anisopliae	1	KM112	not_buried	2	2	0.105	0.602486	0.397514
M.anisopliae	1	KM112	not_buried	2	3	0.139	0.797577	0.202423
M.anisopliae	1	KM112	not_buried	2	4	0.095	0.545107	0.454893
M.anisopliae	1	KM112	not_buried	2	5	0.169	0.969716	0.0302837
M.anisopliae	1	KM112	not_buried	2	6	0.069	0.39592	0.60408
M.anisopliae	1	KM112	not_buried	2	7	0.139	0.797577	0.202423
M.anisopliae	1	KM112	not_buried	2	8	0.276	1.58368	-0.583679
M.anisopliae	1	KM112	not_buried	2	9	0.169	0.969716	0.0302837
M.anisopliae	1	KM240	not_buried	2	1	0.038	0.218043	0.781957
M.anisopliae	1	KM240	not_buried	2	2	0.101	0.579535	0.420465
M.anisopliae	1	KM240	not_buried	2	3	0.056	0.321326	0.678674
M.anisopliae	1	KM240	not_buried	2	4	0.174	0.998406	0.00159388
M.anisopliae	1	KM240	not_buried	2	5	0.315	1.80746	-0.807459
M.anisopliae	1	KM240	not_buried	2	6	0.134	0.768887	0.231113
M.anisopliae	1	KM240	not_buried	2	7	0.101	0.579535	0.420465
M.anisopliae	1	KM240	not_buried	2	8	0.132	0.757412	0.242588
M.anisopliae	1	KM240	not_buried	2	9	0.178	1.02136	-0.021358
M.anisopliae	1	KM269	not_buried	2	1	0.122	0.700032	0.299968
M.anisopliae	1	KM269	not_buried	2	2	0.098	0.562321	0.437679
M.anisopliae	1	KM269	not_buried	2	3	0.083	0.476251	0.523749
M.anisopliae	1	KM269	not_buried	2	4	0.133	0.76315	0.23685
M.anisopliae	1	KM269	not_buried	2	5	0.155	0.889385	0.110615
M.anisopliae	1	KM269	not_buried	2	6	0.114	0.654128	0.345872
M.anisopliae	1	KM269	not_buried	2	7	0.214	1.22792	-0.227925
M.anisopliae	1	KM269	not_buried	2	8	0.094	0.539369	0.460631
M.anisopliae	1	KM269	not_buried	2	9	0.074	0.424609	0.575391
M.anisopliae	1	KM112	buried	2	1	0.108	0.6197	0.3803
M.anisopliae	1	KM112	buried	2	2	0.082	0.470513	0.529487
M.anisopliae	1	KM112	buried	2	3	0.119	0.682818	0.317182
M.anisopliae	1	KM112	buried	2	4	0.135	0.774625	0.225375
M.anisopliae	1	KM112	buried	2	5	0.12	0.688556	0.311444
M.anisopliae	1	KM112	buried	2	6	0.181	1.03857	-0.0385719
M.anisopliae	1	KM112	buried	2	7	0.104	0.596748	0.403252
M.anisopliae	1	KM112	buried	2	8	0.053	0.304112	0.695888
M.anisopliae	1	KM112	buried	2	9	0.08	0.459037	0.540963
M.anisopliae	1	KM240	buried	2	1	0.133	0.76315	0.23685
M.anisopliae	1	KM240	buried	2	2	0.162	0.929551	0.0704495
M.anisopliae	1	KM240	buried	2	3	0.286	1.64106	-0.641058
M.anisopliae	1	KM240	buried	2	4	0.173	0.992668	0.00733185
M.anisopliae	1	KM240	buried	2	5	0.171	0.981192	0.0188078
M.anisopliae	1	KM240	buried	2	6	0.235	1.34842	-0.348422
M.anisopliae	1	KM240	buried	2	7	0.077	0.441823	0.558177
M.anisopliae	1	KM240	buried	2	8	0.054	0.30985	0.69015
M.anisopliae	1	KM240	buried	2	9	0.274	1.5722	-0.572203
M.anisopliae	1	KM269	buried	2	1	0.294	1.68696	-0.686962
M.anisopliae	1	KM269	buried	2	2	0.229	1.31399	-0.313994
M.anisopliae	1	KM269	buried	2	3	0.134	0.768887	0.231113
M.anisopliae	1	KM269	buried	2	4	0.164	0.941026	0.0589735
M.anisopliae	1	KM269	buried	2	5	0.177	1.01562	-0.01562
M.anisopliae	1	KM269	buried	2	6	0.058	0.332802	0.667198
M.anisopliae	1	KM269	buried	2	7	0.156	0.895123	0.104877
M.anisopliae	1	KM269	buried	2	8	0.176	1.00988	-0.00988205
M.anisopliae	1	KM269	buried	2	9	0.143	0.820529	0.179471
M.anisopliae	1	KM112	not_buried	3	1	0.149	0.854957	0.145043
M.anisopliae	1	KM112	not_buried	3	2	0.113	0.64839	0.35161
M.anisopliae	1	KM112	not_buried	3	3	0.129	0.740198	0.259802
M.anisopliae	1	KM112	not_buried	3	4	0.1	0.573797	0.426203
M.anisopliae	1	KM112	not_buried	3	5	0.165	0.946764	0.0532356
M.anisopliae	1	KM112	not_buried	3	6	0.07	0.401658	0.598342
M.anisopliae	1	KM112	not_buried	3	7	0.138	0.791839	0.208161
M.anisopliae	1	KM112	not_buried	3	8	0.263	1.50909	-0.509085
M.anisopliae	1	KM112	not_buried	3	9	0.168	0.963978	0.0360217
M.anisopliae	1	KM240	not_buried	3	1	0.141	0.809053	0.190947
M.anisopliae	1	KM240	not_buried	3	2	0.111	0.636914	0.363086
M.anisopliae	1	KM240	not_buried	3	3	0.057	0.327064	0.672936
M.anisopliae	1	KM240	not_buried	3	4	0.172	0.98693	0.0130698
M.anisopliae	1	KM240	not_buried	3	5	0.308	1.76729	-0.767294
M.anisopliae	1	KM240	not_buried	3	6	0.114	0.654128	0.345872
M.anisopliae	1	KM240	not_buried	3	7	0.102	0.585273	0.414727
M.anisopliae	1	KM240	not_buried	3	8	0.119	0.682818	0.317182
M.anisopliae	1	KM240	not_buried	3	9	0.183	1.05005	-0.0500478
M.anisopliae	1	KM269	not_buried	3	1	0.153	0.877909	0.122091
M.anisopliae	1	KM269	not_buried	3	2	0.078	0.447561	0.552439
M.anisopliae	1	KM269	not_buried	3	3	0.079	0.453299	0.546701
M.anisopliae	1	KM269	not_buried	3	4	0.131	0.751674	0.248326
M.anisopliae	1	KM269	not_buried	3	5	0.15	0.860695	0.139305
M.anisopliae	1	KM269	not_buried	3	6	0.112	0.642652	0.357348
M.anisopliae	1	KM269	not_buried	3	7	0.216	1.2394	-0.239401
M.anisopliae	1	KM269	not_buried	3	8	0.095	0.545107	0.454893
M.anisopliae	1	KM269	not_buried	3	9	0.074	0.424609	0.575391
M.anisopliae	1	KM112	buried	3	1	0.095	0.545107	0.454893
M.anisopliae	1	KM112	buried	3	2	0.064	0.36723	0.63277
M.anisopliae	1	KM112	buried	3	3	0.114	0.654128	0.345872
M.anisopliae	1	KM112	buried	3	4	0.112	0.642652	0.357348
M.anisopliae	1	KM112	buried	3	5	0.167	0.95824	0.0417596
M.anisopliae	1	KM112	buried	3	6	0.211	1.21071	-0.210711
M.anisopliae	1	KM112	buried	3	7	0.111	0.636914	0.363086
M.anisopliae	1	KM112	buried	3	8	0.055	0.315588	0.684412
M.anisopliae	1	KM112	buried	3	9	0.082	0.470513	0.529487
M.anisopliae	1	KM240	buried	3	1	0.174	0.998406	0.00159388
M.anisopliae	1	KM240	buried	3	2	0.169	0.969716	0.0302837
M.anisopliae	1	KM240	buried	3	3	0.286	1.64106	-0.641058
M.anisopliae	1	KM240	buried	3	4	0.174	0.998406	0.00159388
M.anisopliae	1	KM240	buried	3	5	0.174	0.998406	0.00159388
M.anisopliae	1	KM240	buried	3	6	0.221	1.26809	-0.268091
M.anisopliae	1	KM240	buried	3	7	0.078	0.447561	0.552439
M.anisopliae	1	KM240	buried	3	8	0.056	0.321326	0.678674
M.anisopliae	1	KM240	buried	3	9	0.29	1.66401	-0.66401
M.anisopliae	1	KM269	buried	3	1	0.281	1.61237	-0.612369
M.anisopliae	1	KM269	buried	3	2	0.233	1.33695	-0.336946
M.anisopliae	1	KM269	buried	3	3	0.109	0.625438	0.374562
M.anisopliae	1	KM269	buried	3	4	0.168	0.963978	0.0360217
M.anisopliae	1	KM269	buried	3	5	0.178	1.02136	-0.021358
M.anisopliae	1	KM269	buried	3	6	0.058	0.332802	0.667198
M.anisopliae	1	KM269	buried	3	7	0.157	0.900861	0.0991393
M.anisopliae	1	KM269	buried	3	8	0.192	1.10169	-0.10169
M.anisopliae	1	KM269	buried	3	9	0.144	0.826267	0.173733
M.anisopliae	5	KM112	not_buried	1	1	0.036	0.206567	0.793433
M.anisopliae	5	KM112	not_buried	1	2	0.061	0.350016	0.649984
M.anisopliae	5	KM112	not_buried	1	3	0.091	0.522155	0.477845
M.anisopliae	5	KM112	not_buried	1	4	0.235	1.34842	-0.348422
M.anisopliae	5	KM112	not_buried	1	5	0.042	0.240995	0.759005
M.anisopliae	5	KM112	not_buried	1	6	0.228	1.30826	-0.308256
M.anisopliae	5	KM112	not_buried	1	7	0.222	1.27383	-0.273828
M.anisopliae	5	KM112	not_buried	1	8	0.169	0.969716	0.0302837
M.anisopliae	5	KM112	not_buried	1	9	0.054	0.30985	0.69015
M.anisopliae	5	KM240	not_buried	1	1	0.082	0.470513	0.529487
M.anisopliae	5	KM240	not_buried	1	2	0.109	0.625438	0.374562
M.anisopliae	5	KM240	not_buried	1	3	0.364	2.08862	-1.08862
M.anisopliae	5	KM240	not_buried	1	4	0.079	0.453299	0.546701
M.anisopliae	5	KM240	not_buried	1	5	0.36	2.06567	-1.06567
M.anisopliae	5	KM240	not_buried	1	6	0.259	1.48613	-0.486133
M.anisopliae	5	KM240	not_buried	1	7	0.18	1.03283	-0.0328339
M.anisopliae	5	KM240	not_buried	1	8	0.093	0.533631	0.466369
M.anisopliae	5	KM240	not_buried	1	9	0.257	1.47466	-0.474657
M.anisopliae	5	KM269	not_buried	1	1	0.066	0.378706	0.621294
M.anisopliae	5	KM269	not_buried	1	2	0.131	0.751674	0.248326
M.anisopliae	5	KM269	not_buried	1	3	0.141	0.809053	0.190947
M.anisopliae	5	KM269	not_buried	1	4	0.124	0.711508	0.288492
M.anisopliae	5	KM269	not_buried	1	5	0.253	1.45171	-0.451705
M.anisopliae	5	KM269	not_buried	1	6	0.199	1.14186	-0.141855
M.anisopliae	5	KM269	not_buried	1	7	0.107	0.613962	0.386038
M.anisopliae	5	KM269	not_buried	1	8	0.135	0.774625	0.225375
M.anisopliae	5	KM269	not_buried	1	9	0.085	0.487727	0.512273
M.anisopliae	5	KM112	buried	1	1	0.062	0.355754	0.644246
M.anisopliae	5	KM112	buried	1	2	0.041	0.235257	0.764743
M.anisopliae	5	KM112	buried	1	3	0.094	0.539369	0.460631
M.anisopliae	5	KM112	buried	1	4	0.1	0.573797	0.426203
M.anisopliae	5	KM112	buried	1	5	0.237	1.3599	-0.359898
M.anisopliae	5	KM112	buried	1	6	0.117	0.671342	0.328658
M.anisopliae	5	KM112	buried	1	7	0.132	0.757412	0.242588
M.anisopliae	5	KM112	buried	1	8	0.084	0.481989	0.518011
M.anisopliae	5	KM112	buried	1	9	0.08	0.459037	0.540963
M.anisopliae	5	KM240	buried	1	1	0.189	1.08448	-0.0844756
M.anisopliae	5	KM240	buried	1	2	0.153	0.877909	0.122091
M.anisopliae	5	KM240	buried	1	3	0.179	1.0271	-0.027096
M.anisopliae	5	KM240	buried	1	4	0.097	0.556583	0.443417
M.anisopliae	5	KM240	buried	1	5	0.084	0.481989	0.518011
M.anisopliae	5	KM240	buried	1	6	0.077	0.441823	0.558177
M.anisopliae	5	KM240	buried	1	7	0.05	0.286898	0.713102
M.anisopliae	5	KM240	buried	1	8	0.067	0.384444	0.615556
M.anisopliae	5	KM240	buried	1	9	0.058	0.332802	0.667198
M.anisopliae	5	KM269	buried	1	1	0.112	0.642652	0.357348
M.anisopliae	5	KM269	buried	1	2	0.102	0.585273	0.414727
M.anisopliae	5	KM269	buried	1	3	0.268	1.53777	-0.537775
M.anisopliae	5	KM269	buried	1	4	0.157	0.900861	0.0991393
M.anisopliae	5	KM269	buried	1	5	0.127	0.728722	0.271278
M.anisopliae	5	KM269	buried	1	6	0.128	0.73446	0.26554
M.anisopliae	5	KM269	buried	1	7	0.139	0.797577	0.202423
M.anisopliae	5	KM269	buried	1	8	0.079	0.453299	0.546701
M.anisopliae	5	KM269	buried	1	9	0.163	0.935288	0.0647115
M.anisopliae	5	KM112	not_buried	2	1	0.037	0.212305	0.787695
M.anisopliae	5	KM112	not_buried	2	2	0.06	0.344278	0.655722
M.anisopliae	5	KM112	not_buried	2	3	0.114	0.654128	0.345872
M.anisopliae	5	KM112	not_buried	2	4	0.27	1.54925	-0.549251
M.anisopliae	5	KM112	not_buried	2	5	0.253	1.45171	-0.451705
M.anisopliae	5	KM112	not_buried	2	6	0.185	1.06152	-0.0615237
M.anisopliae	5	KM112	not_buried	2	7	0.091	0.522155	0.477845
M.anisopliae	5	KM112	not_buried	2	8	0.177	1.01562	-0.01562
M.anisopliae	5	KM112	not_buried	2	9	0.055	0.315588	0.684412
M.anisopliae	5	KM240	not_buried	2	1	0.08	0.459037	0.540963
M.anisopliae	5	KM240	not_buried	2	2	0.096	0.550845	0.449155
M.anisopliae	5	KM240	not_buried	2	3	0.523	3.00096	-2.00096
M.anisopliae	5	KM240	not_buried	2	4	0.092	0.527893	0.472107
M.anisopliae	5	KM240	not_buried	2	5	0.208	1.1935	-0.193497
M.anisopliae	5	KM240	not_buried	2	6	0.274	1.5722	-0.572203
M.anisopliae	5	KM240	not_buried	2	7	0.128	0.73446	0.26554
M.anisopliae	5	KM240	not_buried	2	8	0.098	0.562321	0.437679
M.anisopliae	5	KM240	not_buried	2	9	0.244	1.40006	-0.400064
M.anisopliae	5	KM269	not_buried	2	1	0.07	0.401658	0.598342
M.anisopliae	5	KM269	not_buried	2	2	0.136	0.780363	0.219637
M.anisopliae	5	KM269	not_buried	2	3	0.141	0.809053	0.190947
M.anisopliae	5	KM269	not_buried	2	4	0.13	0.745936	0.254064
M.anisopliae	5	KM269	not_buried	2	5	0.178	1.02136	-0.021358
M.anisopliae	5	KM269	not_buried	2	6	0.194	1.11317	-0.113165
M.anisopliae	5	KM269	not_buried	2	7	0.11	0.631176	0.368824
M.anisopliae	5	KM269	not_buried	2	8	0.134	0.768887	0.231113
M.anisopliae	5	KM269	not_buried	2	9	0.092	0.527893	0.472107
M.anisopliae	5	KM112	buried	2	1	0.063	0.361492	0.638508
M.anisopliae	5	KM112	buried	2	2	0.042	0.240995	0.759005
M.anisopliae	5	KM112	buried	2	3	0.098	0.562321	0.437679
M.anisopliae	5	KM112	buried	2	4	0.107	0.613962	0.386038
M.anisopliae	5	KM112	buried	2	5	0.243	1.39433	-0.394326
M.anisopliae	5	KM112	buried	2	6	0.108	0.6197	0.3803
M.anisopliae	5	KM112	buried	2	7	0.116	0.665604	0.334396
M.anisopliae	5	KM112	buried	2	8	0.078	0.447561	0.552439
M.anisopliae	5	KM112	buried	2	9	0.083	0.476251	0.523749
M.anisopliae	5	KM240	buried	2	1	0.194	1.11317	-0.113165
M.anisopliae	5	KM240	buried	2	2	0.127	0.728722	0.271278
M.anisopliae	5	KM240	buried	2	3	0.108	0.6197	0.3803
M.anisopliae	5	KM240	buried	2	4	0.1	0.573797	0.426203
M.anisopliae	5	KM240	buried	2	5	0.089	0.510679	0.489321
M.anisopliae	5	KM240	buried	2	6	0.078	0.447561	0.552439
M.anisopliae	5	KM240	buried	2	7	0.053	0.304112	0.695888
M.anisopliae	5	KM240	buried	2	8	0.075	0.430347	0.569653
M.anisopliae	5	KM240	buried	2	9	0.062	0.355754	0.644246
M.anisopliae	5	KM269	buried	2	1	0.158	0.906599	0.0934013
M.anisopliae	5	KM269	buried	2	2	0.103	0.591011	0.408989
M.anisopliae	5	KM269	buried	2	3	0.229	1.31399	-0.313994
M.anisopliae	5	KM269	buried	2	4	0.11	0.631176	0.368824
M.anisopliae	5	KM269	buried	2	5	0.131	0.751674	0.248326
M.anisopliae	5	KM269	buried	2	6	0.138	0.791839	0.208161
M.anisopliae	5	KM269	buried	2	7	0.133	0.76315	0.23685
M.anisopliae	5	KM269	buried	2	8	0.087	0.499203	0.500797
M.anisopliae	5	KM269	buried	2	9	0.148	0.849219	0.150781
M.anisopliae	5	KM112	not_buried	3	1	0.036	0.206567	0.793433
M.anisopliae	5	KM112	not_buried	3	2	0.055	0.315588	0.684412
M.anisopliae	5	KM112	not_buried	3	3	0.101	0.579535	0.420465
M.anisopliae	5	KM112	not_buried	3	4	0.254	1.45744	-0.457443
M.anisopliae	5	KM112	not_buried	3	5	0.258	1.4804	-0.480395
M.anisopliae	5	KM112	not_buried	3	6	0.196	1.12464	-0.124641
M.anisopliae	5	KM112	not_buried	3	7	0.078	0.447561	0.552439
M.anisopliae	5	KM112	not_buried	3	8	0.176	1.00988	-0.00988205
M.anisopliae	5	KM112	not_buried	3	9	0.056	0.321326	0.678674
M.anisopliae	5	KM240	not_buried	3	1	0.079	0.453299	0.546701
M.anisopliae	5	KM240	not_buried	3	2	0.092	0.527893	0.472107
M.anisopliae	5	KM240	not_buried	3	3	0.471	2.70258	-1.70258
M.anisopliae	5	KM240	not_buried	3	4	0.092	0.527893	0.472107
M.anisopliae	5	KM240	not_buried	3	5	0.195	1.1189	-0.118903
M.anisopliae	5	KM240	not_buried	3	6	0.257	1.47466	-0.474657
M.anisopliae	5	KM240	not_buried	3	7	0.126	0.722984	0.277016
M.anisopliae	5	KM240	not_buried	3	8	0.112	0.642652	0.357348
M.anisopliae	5	KM240	not_buried	3	9	0.23	1.31973	-0.319732
M.anisopliae	5	KM269	not_buried	3	1	0.079	0.453299	0.546701
M.anisopliae	5	KM269	not_buried	3	2	0.139	0.797577	0.202423
M.anisopliae	5	KM269	not_buried	3	3	0.139	0.797577	0.202423
M.anisopliae	5	KM269	not_buried	3	4	0.128	0.73446	0.26554
M.anisopliae	5	KM269	not_buried	3	5	0.159	0.912337	0.0876634
M.anisopliae	5	KM269	not_buried	3	6	0.19	1.09021	-0.0902136
M.anisopliae	5	KM269	not_buried	3	7	0.11	0.631176	0.368824
M.anisopliae	5	KM269	not_buried	3	8	0.136	0.780363	0.219637
M.anisopliae	5	KM269	not_buried	3	9	0.098	0.562321	0.437679
M.anisopliae	5	KM112	buried	3	1	0.063	0.361492	0.638508
M.anisopliae	5	KM112	buried	3	2	0.045	0.258208	0.741792
M.anisopliae	5	KM112	buried	3	3	0.099	0.568059	0.431941
M.anisopliae	5	KM112	buried	3	4	0.124	0.711508	0.288492
M.anisopliae	5	KM112	buried	3	5	0.238	1.36564	-0.365636
M.anisopliae	5	KM112	buried	3	6	0.116	0.665604	0.334396
M.anisopliae	5	KM112	buried	3	7	0.114	0.654128	0.345872
M.anisopliae	5	KM112	buried	3	8	0.086	0.493465	0.506535
M.anisopliae	5	KM112	buried	3	9	0.086	0.493465	0.506535
M.anisopliae	5	KM240	buried	3	1	0.25	1.43449	-0.434492
M.anisopliae	5	KM240	buried	3	2	0.144	0.826267	0.173733
M.anisopliae	5	KM240	buried	3	3	0.086	0.493465	0.506535
M.anisopliae	5	KM240	buried	3	4	0.104	0.596748	0.403252
M.anisopliae	5	KM240	buried	3	5	0.087	0.499203	0.500797
M.anisopliae	5	KM240	buried	3	6	0.073	0.418872	0.581128
M.anisopliae	5	KM240	buried	3	7	0.061	0.350016	0.649984
M.anisopliae	5	KM240	buried	3	8	0.084	0.481989	0.518011
M.anisopliae	5	KM240	buried	3	9	0.065	0.372968	0.627032
M.anisopliae	5	KM269	buried	3	1	0.321	1.84189	-0.841887
M.anisopliae	5	KM269	buried	3	2	0.093	0.533631	0.466369
M.anisopliae	5	KM269	buried	3	3	0.164	0.941026	0.0589735
M.anisopliae	5	KM269	buried	3	4	0.114	0.654128	0.345872
M.anisopliae	5	KM269	buried	3	5	0.151	0.866433	0.133567
M.anisopliae	5	KM269	buried	3	6	0.148	0.849219	0.150781
M.anisopliae	5	KM269	buried	3	7	0.142	0.814791	0.185209
M.anisopliae	5	KM269	buried	3	8	0.105	0.602486	0.397514
M.anisopliae	5	KM269	buried	3	9	0.136	0.780363	0.219637
M.anisopliae	10	KM112	not_buried	1	1	0.18	1.03283	-0.0328339
M.anisopliae	10	KM112	not_buried	1	2	0.119	0.682818	0.317182
M.anisopliae	10	KM112	not_buried	1	3	0.227	1.30252	-0.302518
M.anisopliae	10	KM112	not_buried	1	4	0.161	0.923813	0.0761874
M.anisopliae	10	KM112	not_buried	1	5	0.097	0.556583	0.443417
M.anisopliae	10	KM112	not_buried	1	6	0.104	0.596748	0.403252
M.anisopliae	10	KM112	not_buried	1	7	0.161	0.923813	0.0761874
M.anisopliae	10	KM112	not_buried	1	8	0.165	0.946764	0.0532356
M.anisopliae	10	KM112	not_buried	1	9	0.118	0.67708	0.32292
M.anisopliae	10	KM240	not_buried	1	1	0.136	0.780363	0.219637
M.anisopliae	10	KM240	not_buried	1	2	0.089	0.510679	0.489321
M.anisopliae	10	KM240	not_buried	1	3	0.095	0.545107	0.454893
M.anisopliae	10	KM240	not_buried	1	4	0.099	0.568059	0.431941
M.anisopliae	10	KM240	not_buried	1	5	0.126	0.722984	0.277016
M.anisopliae	10	KM240	not_buried	1	6	0.213	1.22219	-0.222187
M.anisopliae	10	KM240	not_buried	1	7	0.142	0.814791	0.185209
M.anisopliae	10	KM240	not_buried	1	8	0.051	0.292636	0.707364
M.anisopliae	10	KM240	not_buried	1	9	0.105	0.602486	0.397514
M.anisopliae	10	KM269	not_buried	1	1	0.057	0.327064	0.672936
M.anisopliae	10	KM269	not_buried	1	2	0.14	0.803315	0.196685
M.anisopliae	10	KM269	not_buried	1	3	0.115	0.659866	0.340134
M.anisopliae	10	KM269	not_buried	1	4	0.139	0.797577	0.202423
M.anisopliae	10	KM269	not_buried	1	5	0.148	0.849219	0.150781
M.anisopliae	10	KM269	not_buried	1	6	0.318	1.82467	-0.824673
M.anisopliae	10	KM269	not_buried	1	7	0.12	0.688556	0.311444
M.anisopliae	10	KM269	not_buried	1	8	0.126	0.722984	0.277016
M.anisopliae	10	KM269	not_buried	1	9	0.099	0.568059	0.431941
M.anisopliae	10	KM112	buried	1	1	0.096	0.550845	0.449155
M.anisopliae	10	KM112	buried	1	2	0.09	0.516417	0.483583
M.anisopliae	10	KM112	buried	1	3	0.096	0.550845	0.449155
M.anisopliae	10	KM112	buried	1	4	0.151	0.866433	0.133567
M.anisopliae	10	KM112	buried	1	5	0.226	1.29678	-0.29678
M.anisopliae	10	KM112	buried	1	6	0.161	0.923813	0.0761874
M.anisopliae	10	KM112	buried	1	7	0.173	0.992668	0.00733185
M.anisopliae	10	KM112	buried	1	8	0.139	0.797577	0.202423
M.anisopliae	10	KM112	buried	1	9	0.036	0.206567	0.793433
M.anisopliae	10	KM240	buried	1	1	0.037	0.212305	0.787695
M.anisopliae	10	KM240	buried	1	2	0.038	0.218043	0.781957
M.anisopliae	10	KM240	buried	1	3	0.037	0.212305	0.787695
M.anisopliae	10	KM240	buried	1	4	0.037	0.212305	0.787695
M.anisopliae	10	KM240	buried	1	5	0.036	0.206567	0.793433
M.anisopliae	10	KM240	buried	1	6	0.038	0.218043	0.781957
M.anisopliae	10	KM240	buried	1	7	0.038	0.218043	0.781957
M.anisopliae	10	KM240	buried	1	8	0.038	0.218043	0.781957
M.anisopliae	10	KM240	buried	1	9	0.17	0.975454	0.0245457
M.anisopliae	10	KM269	buried	1	1	0.069	0.39592	0.60408
M.anisopliae	10	KM269	buried	1	2	0.11	0.631176	0.368824
M.anisopliae	10	KM269	buried	1	3	0.135	0.774625	0.225375
M.anisopliae	10	KM269	buried	1	4	0.154	0.883647	0.116353
M.anisopliae	10	KM269	buried	1	5	0.146	0.837743	0.162257
M.anisopliae	10	KM269	buried	1	6	0.16	0.918075	0.0819254
M.anisopliae	10	KM269	buried	1	7	0.258	1.4804	-0.480395
M.anisopliae	10	KM269	buried	1	8	0.128	0.73446	0.26554
M.anisopliae	10	KM269	buried	1	9	0.119	0.682818	0.317182
M.anisopliae	10	KM112	not_buried	2	1	0.169	0.969716	0.0302837
M.anisopliae	10	KM112	not_buried	2	2	0.14	0.803315	0.196685
M.anisopliae	10	KM112	not_buried	2	3	0.297	1.70418	-0.704176
M.anisopliae	10	KM112	not_buried	2	4	0.216	1.2394	-0.239401
M.anisopliae	10	KM112	not_buried	2	5	0.168	0.963978	0.0360217
M.anisopliae	10	KM112	not_buried	2	6	0.131	0.751674	0.248326
M.anisopliae	10	KM112	not_buried	2	7	0.188	1.07874	-0.0787376
M.anisopliae	10	KM112	not_buried	2	8	0.155	0.889385	0.110615
M.anisopliae	10	KM112	not_buried	2	9	0.13	0.745936	0.254064
M.anisopliae	10	KM240	not_buried	2	1	0.2	1.14759	-0.147593
M.anisopliae	10	KM240	not_buried	2	2	0.096	0.550845	0.449155
M.anisopliae	10	KM240	not_buried	2	3	0.092	0.527893	0.472107
M.anisopliae	10	KM240	not_buried	2	4	0.106	0.608224	0.391776
M.anisopliae	10	KM240	not_buried	2	5	0.152	0.872171	0.127829
M.anisopliae	10	KM240	not_buried	2	6	0.254	1.45744	-0.457443
M.anisopliae	10	KM240	not_buried	2	7	0.155	0.889385	0.110615
M.anisopliae	10	KM240	not_buried	2	8	0.051	0.292636	0.707364
M.anisopliae	10	KM240	not_buried	2	9	0.119	0.682818	0.317182
M.anisopliae	10	KM269	not_buried	2	1	0.059	0.33854	0.66146
M.anisopliae	10	KM269	not_buried	2	2	0.133	0.76315	0.23685
M.anisopliae	10	KM269	not_buried	2	3	0.122	0.700032	0.299968
M.anisopliae	10	KM269	not_buried	2	4	0.142	0.814791	0.185209
M.anisopliae	10	KM269	not_buried	2	5	0.143	0.820529	0.179471
M.anisopliae	10	KM269	not_buried	2	6	0.334	1.91648	-0.916481
M.anisopliae	10	KM269	not_buried	2	7	0.12	0.688556	0.311444
M.anisopliae	10	KM269	not_buried	2	8	0.111	0.636914	0.363086
M.anisopliae	10	KM269	not_buried	2	9	0.115	0.659866	0.340134
M.anisopliae	10	KM112	buried	2	1	0.096	0.550845	0.449155
M.anisopliae	10	KM112	buried	2	2	0.097	0.556583	0.443417
M.anisopliae	10	KM112	buried	2	3	0.107	0.613962	0.386038
M.anisopliae	10	KM112	buried	2	4	0.161	0.923813	0.0761874
M.anisopliae	10	KM112	buried	2	5	0.25	1.43449	-0.434492
M.anisopliae	10	KM112	buried	2	6	0.182	1.04431	-0.0443098
M.anisopliae	10	KM112	buried	2	7	0.175	1.00414	-0.00414409
M.anisopliae	10	KM112	buried	2	8	0.153	0.877909	0.122091
M.anisopliae	10	KM112	buried	2	9	0.036	0.206567	0.793433
M.anisopliae	10	KM240	buried	2	1	0.037	0.212305	0.787695
M.anisopliae	10	KM240	buried	2	2	0.038	0.218043	0.781957
M.anisopliae	10	KM240	buried	2	3	0.037	0.212305	0.787695
M.anisopliae	10	KM240	buried	2	4	0.037	0.212305	0.787695
M.anisopliae	10	KM240	buried	2	5	0.036	0.206567	0.793433
M.anisopliae	10	KM240	buried	2	6	0.038	0.218043	0.781957
M.anisopliae	10	KM240	buried	2	7	0.038	0.218043	0.781957
M.anisopliae	10	KM240	buried	2	8	0.038	0.218043	0.781957
M.anisopliae	10	KM240	buried	2	9	0.19	1.09021	-0.0902136
M.anisopliae	10	KM269	buried	2	1	0.1	0.573797	0.426203
M.anisopliae	10	KM269	buried	2	2	0.145	0.832005	0.167995
M.anisopliae	10	KM269	buried	2	3	0.161	0.923813	0.0761874
M.anisopliae	10	KM269	buried	2	4	0.146	0.837743	0.162257
M.anisopliae	10	KM269	buried	2	5	0.126	0.722984	0.277016
M.anisopliae	10	KM269	buried	2	6	0.169	0.969716	0.0302837
M.anisopliae	10	KM269	buried	2	7	0.262	1.50335	-0.503347
M.anisopliae	10	KM269	buried	2	8	0.127	0.728722	0.271278
M.anisopliae	10	KM269	buried	2	9	0.165	0.946764	0.0532356
M.anisopliae	10	KM112	not_buried	3	1	0.166	0.952502	0.0474976
M.anisopliae	10	KM112	not_buried	3	2	0.159	0.912337	0.0876634
M.anisopliae	10	KM112	not_buried	3	3	0.324	1.8591	-0.859101
M.anisopliae	10	KM112	not_buried	3	4	0.242	1.38859	-0.388588
M.anisopliae	10	KM112	not_buried	3	5	0.153	0.877909	0.122091
M.anisopliae	10	KM112	not_buried	3	6	0.191	1.09595	-0.0959515
M.anisopliae	10	KM112	not_buried	3	7	0.207	1.18776	-0.187759
M.anisopliae	10	KM112	not_buried	3	8	0.13	0.745936	0.254064
M.anisopliae	10	KM112	not_buried	3	9	0.133	0.76315	0.23685
M.anisopliae	10	KM240	not_buried	3	1	0.285	1.63532	-0.63532
M.anisopliae	10	KM240	not_buried	3	2	0.096	0.550845	0.449155
M.anisopliae	10	KM240	not_buried	3	3	0.096	0.550845	0.449155
M.anisopliae	10	KM240	not_buried	3	4	0.101	0.579535	0.420465
M.anisopliae	10	KM240	not_buried	3	5	0.16	0.918075	0.0819254
M.anisopliae	10	KM240	not_buried	3	6	0.29	1.66401	-0.66401
M.anisopliae	10	KM240	not_buried	3	7	0.149	0.854957	0.145043
M.anisopliae	10	KM240	not_buried	3	8	0.051	0.292636	0.707364
M.anisopliae	10	KM240	not_buried	3	9	0.145	0.832005	0.167995
M.anisopliae	10	KM269	not_buried	3	1	0.061	0.350016	0.649984
M.anisopliae	10	KM269	not_buried	3	2	0.107	0.613962	0.386038
M.anisopliae	10	KM269	not_buried	3	3	0.123	0.70577	0.29423
M.anisopliae	10	KM269	not_buried	3	4	0.144	0.826267	0.173733
M.anisopliae	10	KM269	not_buried	3	5	0.142	0.814791	0.185209
M.anisopliae	10	KM269	not_buried	3	6	0.351	2.01403	-1.01403
M.anisopliae	10	KM269	not_buried	3	7	0.122	0.700032	0.299968
M.anisopliae	10	KM269	not_buried	3	8	0.106	0.608224	0.391776
M.anisopliae	10	KM269	not_buried	3	9	0.138	0.791839	0.208161
M.anisopliae	10	KM112	buried	3	1	0.095	0.545107	0.454893
M.anisopliae	10	KM112	buried	3	2	0.113	0.64839	0.35161
M.anisopliae	10	KM112	buried	3	3	0.123	0.70577	0.29423
M.anisopliae	10	KM112	buried	3	4	0.159	0.912337	0.0876634
M.anisopliae	10	KM112	buried	3	5	0.245	1.4058	-0.405802
M.anisopliae	10	KM112	buried	3	6	0.164	0.941026	0.0589735
M.anisopliae	10	KM112	buried	3	7	0.179	1.0271	-0.027096
M.anisopliae	10	KM112	buried	3	8	0.168	0.963978	0.0360217
M.anisopliae	10	KM112	buried	3	9	0.037	0.212305	0.787695
M.anisopliae	10	KM240	buried	3	1	0.037	0.212305	0.787695
M.anisopliae	10	KM240	buried	3	2	0.038	0.218043	0.781957
M.anisopliae	10	KM240	buried	3	3	0.037	0.212305	0.787695
M.anisopliae	10	KM240	buried	3	4	0.037	0.212305	0.787695
M.anisopliae	10	KM240	buried	3	5	0.036	0.206567	0.793433
M.anisopliae	10	KM240	buried	3	6	0.038	0.218043	0.781957
M.anisopliae	10	KM240	buried	3	7	0.038	0.218043	0.781957
M.anisopliae	10	KM240	buried	3	8	0.038	0.218043	0.781957
M.anisopliae	10	KM240	buried	3	9	0.158	0.906599	0.0934013
M.anisopliae	10	KM269	buried	3	1	0.246	1.41154	-0.41154
M.anisopliae	10	KM269	buried	3	2	0.13	0.745936	0.254064
M.anisopliae	10	KM269	buried	3	3	0.178	1.02136	-0.021358
M.anisopliae	10	KM269	buried	3	4	0.129	0.740198	0.259802
M.anisopliae	10	KM269	buried	3	5	0.114	0.654128	0.345872
M.anisopliae	10	KM269	buried	3	6	0.127	0.728722	0.271278
M.anisopliae	10	KM269	buried	3	7	0.209	1.19923	-0.199235
M.anisopliae	10	KM269	buried	3	8	0.118	0.67708	0.32292
M.anisopliae	10	KM269	buried	3	9	0.154	0.883647	0.116353
